# Supplementary material for: Changes in Alcohol Consumption during the COVID-19 Pandemic—Small Change in Total Consumption, but Increase in Proportion of Heavy Drinkers
Source: MDPI journal article supplement (doi:10.3390/ijerph18084231), 2021-04-16
Supplement: s1 [file s1]

**Supplementary Table S1.** Overview of how qualitative responses to questions about changes in drinking frequency and usual quantity per occasion were translated into quantified measures of drinking frequency and usual quantity per occasion during the pandemic based on responses to questions on baseline consumption (AUDIT-C, question 1 and question 2) in four different models, for Survey 1 (ESAC). Models 1, 2 and 3 assume change relative to the baseline level, whereas Model 4 assumes an absolute change, irrespective of baseline level.

|                                    | Models assuming relative change |               |           |               |           |                  |               |           |               |           |                 |               |           |               |           | Model assuming absolute change |               |           |               |           |
|------------------------------------|---------------------------------|---------------|-----------|---------------|-----------|------------------|---------------|-----------|---------------|-----------|-----------------|---------------|-----------|---------------|-----------|--------------------------------|---------------|-----------|---------------|-----------|
|                                    | Model 1 - small                 |               |           |               |           | Model 2 - medium |               |           |               |           | Model 3 - large |               |           |               |           | Model 4                        |               |           |               |           |
|                                    | Much less                       | Slightly less | No change | A little more | Much more | Much less        | A little less | No change | A little more | Much more | Much less       | A little less | No change | A little more | Much more | Much less                      | A little less | No change | A little more | Much more |
| AUDIT-C question 1                 |                                 |               |           |               |           |                  |               |           |               |           |                 |               |           |               |           |                                |               |           |               |           |
| Quantified change                  | -23%                            | -5%           | 0         | +5%           | +30%      | -33%             | -9%           | 0         | +10%          | +50%      | -50%            | -13%          | 0         | +15%          | +100%     | -50                            | - 10          | 0         | + 10          | +50       |
| Monthly or less = 6 <sup>a</sup>   | 4.6                             | 5.7           | 6         | 6.3           | 7.8       | 4                | 5.5           | 6         | 6.6           | 9         | 3               | 5.2           | 6         | 6.9           | 12        | 0                              | 0             | 6         | 16            | 56        |
| 2-4 times a month =40 <sup>a</sup> | 30.8                            | 38            | 40        | 42            | 52        | 26               | 36            | 40        | 44            | 60        | 20              | 35            | 40        | 46            | 80        | 0                              | 30            | 40        | 50            | 90        |
| 2-3 times a week =120 <sup>a</sup> | 92.4                            | 114           | 120       | 126           | 156       | 79               | 109           | 120       | 132           | 180       | 60              | 104           | 120       | 138           | 240       | 70                             | 110           | 120       | 130           | 170       |
| 4 + times a week =250 <sup>a</sup> | 192,5                           | 237.5         | 250       | 262.5         | 345       | 165              | 228           | 250       | 275           | 365       | 125             | 218           | 250       | 288           | 365       | 200                            | 240           | 250       | 260           | 300       |
| AUDIT-C question 2                 |                                 |               |           |               |           |                  |               |           |               |           |                 |               |           |               |           |                                |               |           |               |           |
| Quantified change                  | -23%                            | -5%           | 0         | +5%           | +30%      | -33%             | -9%           | 0         | +10%          | +50%      | -50%            | -13%          | 0         | +15%          | +100%     | -1.0                           | - 0.1         | 0         | + 0.1         | +1.0      |
| 1 or 2 =1.5 <sup>b</sup>           | 1.2                             | 1.4           | 1.5       | 1.6           | 2.0       | 1.0              | 1.4           | 1.5       | 1.7           | 2.3       | 0.7             | 1.3           | 1.5       | 1.7           | 3.0       | 0.5                            | 1.4           | 1.5       | 1.6           | 2.5       |
| 3 or 4 =3.5 <sup>b</sup>           | 2.7                             | 3.3           | 3.5       | 3.7           | 4.6       | 2.3              | 3.2           | 3.5       | 3.9           | 5.3       | 1.8             | 3.0           | 3.5       | 4.0           | 7.0       | 1.5                            | 3.4           | 3.5       | 3.6           | 4.5       |
| 5 or 6 =5.5 <sup>b</sup>           | 4.2                             | 5.2           | 5.5       | 5.8           | 7.2       | 3.6              | 5.0           | 5.5       | 6.1           | 8.3       | 2.8             | 4.8           | 5.5       | 6.3           | 11.0      | 4.5                            | 5.4           | 5.5       | 5.6           | 6.5       |
| 7-9 =8.0 <sup>b</sup>              | 6.2                             | 7.6           | 8.0       | 8.4           | 10.4      | 5.3              | 7.3           | 8.0       | 8.8           | 12.0      | 4.0             | 7.0           | 8.0       | 9.2           | 16.0      | 7.0                            | 7.9           | 8.0       | 8.1           | 9.0       |
| 10 or more =12.0 <sup>b</sup>      | 9.2                             | 11.4          | 12.0      | 12.6          | 15.6      | 7.9              | 10.9          | 12.0      | 13.2          | 18.0      | 6.0             | 10.4          | 12.0      | 13.8          | 24.0      | 11.0                           | 11.9          | 12.0      | 12.1          | 13.0      |

<sup>a</sup> Given value for number of drinking occasions in the past 12 months; <sup>b</sup> Given value for usual number of alcohol units per drinking occasion
